# Supplementary material for: Genome-wide copy number variant analysis reveals variants associated with 10 diverse production traits in Holstein cattle
Source: PubMed Central journal article supplement (PMC5930521; doi:10.1186/s12864-018-4699-5), 2018-05-02

## CNV ASSOCIATED WITH DAIRY PRODUCTION TRAITS

**Fig. S1** Box plot for dPTA distribution of the 2 feed intake-related phenotypes of RFI and DMI.

CNV type: -1 = loss (n = 467 cows); 0 = neutral (n = 6 cows). Only 2 CNV genotypes had significant associations with RFI and DMI.

CNV ASSOCIATED WITH DAIRY PRODUCTION TRAITS

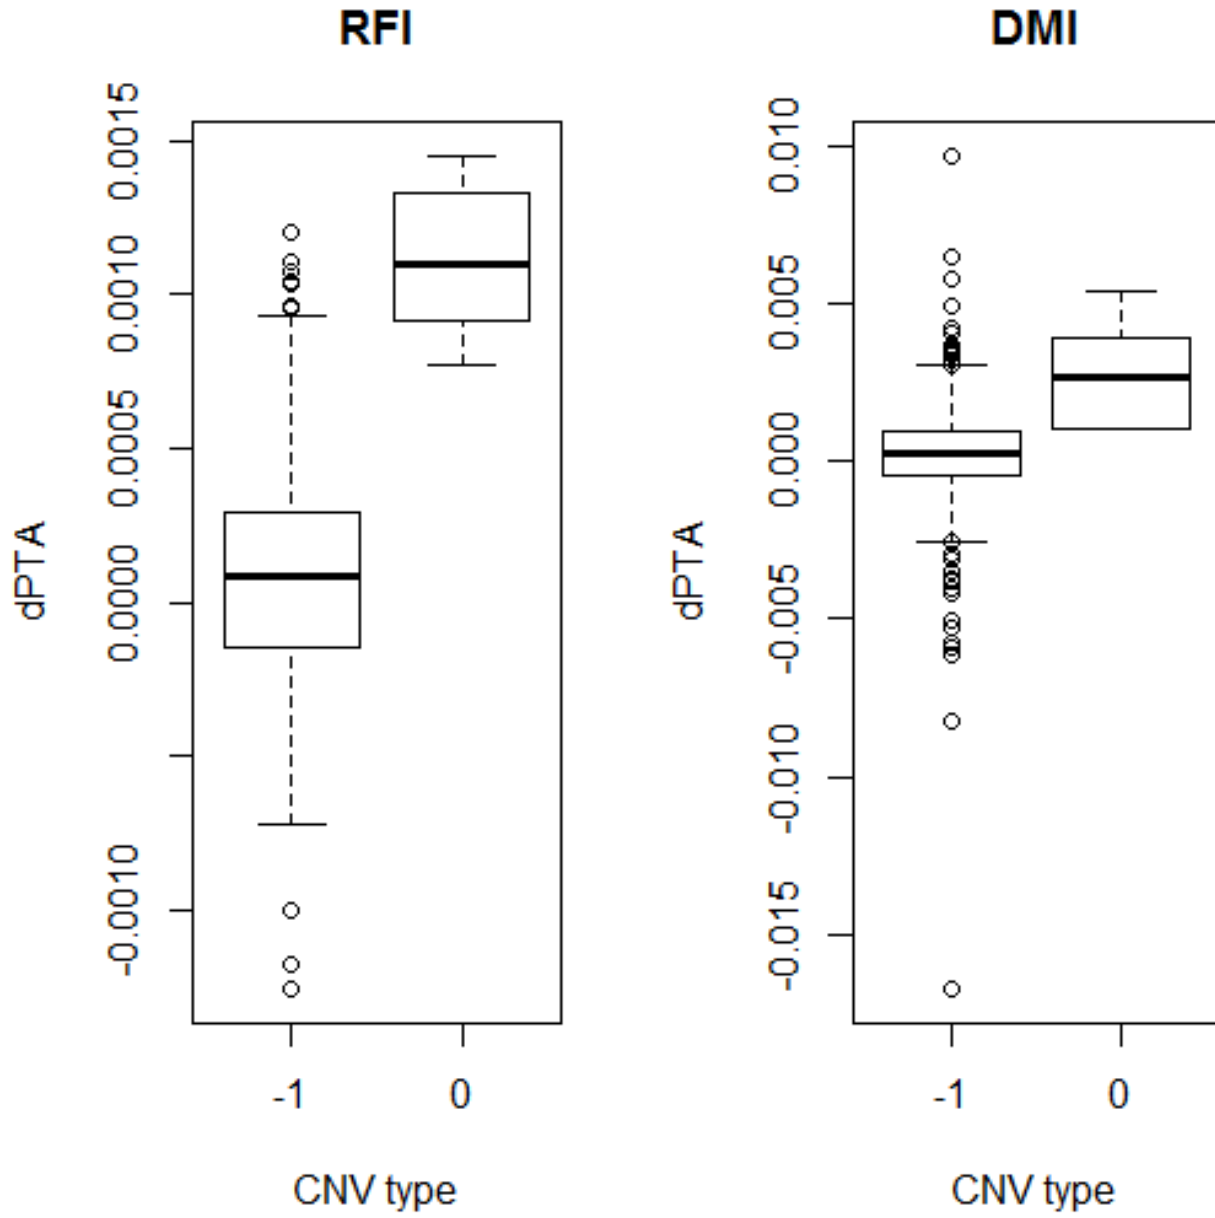

Supplement: 12864_2018_4699_MOESM1_ESM.pdf [file 12864_2018_4699_MOESM1_ESM.pdf]
